# Supplementary material for: Solvent promoted reversible cyclometalation in a tethered NHC iridium complex
Source: Royal Society of Chemistry journal article supplement (doi:10.1039/c3cc48015a), 2013-11-22
Supplement: c3cc48015a_2.pdf [file c3cc48015a_2.pdf]

54

| Complex 2 ===== |          |          |          |
|-----------------|----------|----------|----------|
| Ir              | 0.55828  | -0.27399 | -0.02879 |
| N               | -1.47969 | 1.29515  | 1.38723  |
| C               | -1.38588 | 0.23867  | 0.50470  |
| N               | 0.71897  | 1.81413  | -0.43739 |
| C               | 2.49406  | -0.73093 | -1.01092 |
| N               | -2.69745 | -0.06288 | 0.20395  |
| C               | 0.51977  | -2.46190 | 0.00962  |
| C               | 0.47558  | 4.07653  | 0.37741  |
| C               | 1.69291  | -3.13170 | -0.71223 |
| C               | -4.62302 | -0.81071 | -1.19801 |
| C               | -0.29924 | 2.08335  | 1.77787  |
| C               | -3.18929 | -1.14562 | -0.73387 |
| C               | 0.57438  | -1.94925 | 1.33968  |
| C               | -2.27547 | -1.18092 | -1.97511 |
| C               | -3.56362 | 0.77819  | 0.90896  |
| C               | 2.47539  | -2.13193 | -1.59786 |
| C               | 0.99611  | 4.58841  | -0.82079 |
| C               | 2.74230  | -0.40387 | 0.34575  |
| C               | -3.20991 | -2.48140 | 0.04025  |
| C               | -2.80096 | 1.64018  | 1.64361  |
| C               | 0.33407  | 2.69300  | 0.53954  |
| C               | 3.08094  | -1.42038 | 1.43775  |
| C               | 1.82278  | -1.90282 | 2.20706  |
| C               | 1.18997  | 2.31696  | -1.61091 |
| C               | 1.34064  | 3.68863  | -1.83757 |
| H               | 1.62290  | -1.21872 | 3.05079  |
| H               | 2.00370  | -2.89859 | 2.65962  |
| H               | 3.61612  | -2.27566 | 0.99347  |
| H               | 3.78586  | -0.95911 | 2.14954  |
| H               | 3.06895  | 0.62508  | 0.55045  |
| H               | 2.69781  | 0.06045  | -1.74662 |
| H               | -0.36338 | -1.95100 | 1.91329  |
| H               | -0.46329 | -2.79185 | -0.34442 |
| H               | 1.30538  | -3.95028 | -1.34169 |
| H               | 2.36100  | -3.60905 | 0.02402  |
| H               | 1.99842  | -2.07333 | -2.59213 |
| H               | 3.50860  | -2.49219 | -1.77402 |
| H               | 0.41768  | 1.42016  | 2.29277  |
| H               | -0.62565 | 2.87122  | 2.47344  |
| H               | 0.17196  | 4.74584  | 1.18755  |
| H               | 1.11424  | 5.66669  | -0.96028 |
| H               | 1.72612  | 4.03342  | -2.80046 |
| H               | 1.44563  | 1.58363  | -2.37845 |
| H               | -3.08209 | 2.44110  | 2.32246  |
| H               | -4.64252 | 0.70259  | 0.83413  |
| H               | -3.54721 | -3.29482 | -0.62271 |
| H               | -3.90816 | -2.42434 | 0.89193  |
| H               | -2.21696 | -2.74588 | 0.43329  |
| H               | -4.68636 | 0.19634  | -1.64219 |
| H               | -5.36565 | -0.89896 | -0.38805 |
| H               | -4.91093 | -1.53779 | -1.97372 |
| H               | -2.55533 | -2.03729 | -2.60992 |

|                                                                                    |          |          |          |
|------------------------------------------------------------------------------------|----------|----------|----------|
| H                                                                                  | -2.39740 | -0.25878 | -2.56779 |
| H                                                                                  | -1.20901 | -1.27173 | -1.70375 |
| 59                                                                                 |          |          |          |
| [Ir(C <sub>8</sub> H <sub>13</sub> )(py-ItBu')(ClCH <sub>2</sub> Cl)] <sup>+</sup> | =====    | =====    | =====    |
| C                                                                                  | -0.19656 | 3.58486  | 1.75626  |
| C                                                                                  | 1.13276  | 3.51914  | 1.42153  |
| C                                                                                  | -2.22452 | 2.12430  | 1.17283  |
| C                                                                                  | 3.10741  | 2.83238  | -0.88972 |
| C                                                                                  | -0.90661 | 1.01123  | -2.03967 |
| C                                                                                  | -2.36367 | 0.57627  | -2.29520 |
| C                                                                                  | -3.51934 | 0.45487  | 2.53752  |
| C                                                                                  | -2.55417 | 0.69124  | 1.54521  |
| C                                                                                  | 0.13827  | 1.65081  | 0.61974  |
| C                                                                                  | -0.00964 | 0.83168  | -3.28497 |
| C                                                                                  | -2.54531 | -0.80117 | -2.95262 |
| C                                                                                  | 2.50895  | 1.75955  | 0.04260  |
| C                                                                                  | -3.87969 | -0.85548 | 2.87443  |
| C                                                                                  | 3.53171  | 1.34273  | 1.11984  |
| C                                                                                  | 1.98985  | 0.51808  | -0.77750 |
| C                                                                                  | 0.53620  | -0.61540 | -3.43994 |
| C                                                                                  | -2.05721 | -1.98626 | -2.09680 |
| C                                                                                  | -3.23400 | -1.90332 | 2.20799  |
| C                                                                                  | -2.27521 | -1.59719 | 1.23856  |
| C                                                                                  | 0.51237  | -1.39809 | -2.12352 |
| C                                                                                  | -0.64592 | -1.93407 | -1.52004 |
| H                                                                                  | -0.75694 | 4.33914  | 2.30295  |
| H                                                                                  | -2.75517 | 2.80957  | 1.84972  |
| H                                                                                  | -2.57299 | 2.33209  | 0.14360  |
| H                                                                                  | 1.94498  | 4.20914  | 1.63214  |
| H                                                                                  | -0.90969 | 2.08128  | -1.76000 |
| H                                                                                  | 3.47358  | 3.71010  | -0.32876 |
| H                                                                                  | -2.95305 | 0.61972  | -1.36096 |
| H                                                                                  | -3.98692 | 1.30658  | 3.04013  |
| H                                                                                  | 2.36509  | 3.17489  | -1.62967 |
| H                                                                                  | -0.57347 | 1.13392  | -4.18949 |
| H                                                                                  | -3.61836 | -0.95769 | -3.16363 |
| H                                                                                  | 3.96713  | 2.40625  | -1.43196 |
| H                                                                                  | 0.83960  | 1.53019  | -3.21461 |
| H                                                                                  | -2.05085 | -0.80495 | -3.93797 |
| H                                                                                  | 3.85440  | 2.20686  | 1.72681  |
| H                                                                                  | -4.63564 | -1.04982 | 3.64038  |
| H                                                                                  | 2.19004  | 0.70028  | -1.84417 |
| H                                                                                  | -0.03145 | -1.17751 | -4.20211 |
| H                                                                                  | 3.10535  | 0.58109  | 1.79188  |
| H                                                                                  | 4.42757  | 0.91761  | 0.63921  |
| H                                                                                  | -2.77073 | -2.12911 | -1.26326 |
| H                                                                                  | 1.57422  | -0.58098 | -3.81007 |
| H                                                                                  | -2.13091 | -2.91592 | -2.69746 |
| H                                                                                  | 2.59016  | -0.36296 | -0.48679 |
| H                                                                                  | -3.45997 | -2.94992 | 2.42794  |
| H                                                                                  | -1.74160 | -2.39337 | 0.72000  |
| H                                                                                  | 1.46600  | -1.86475 | -1.84416 |
| H                                                                                  | -0.45189 | -2.76333 | -0.81916 |
| Ir                                                                                 | -0.04340 | -0.04047 | -0.41779 |

|    |          |          |          |
|----|----------|----------|----------|
| N  | -0.79237 | 2.42491  | 1.25208  |
| N  | 1.31089  | 2.33073  | 0.71844  |
| N  | -1.93190 | -0.33002 | 0.87921  |
| H  | -2.80861 | 1.33768  | -2.96988 |
| Cl | 1.05780  | -1.65662 | 1.85651  |
| C  | 2.01730  | -3.13897 | 1.39544  |
| Cl | 3.75265  | -2.81068 | 1.17419  |
| H  | 1.60117  | -3.51247 | 0.45156  |
| H  | 1.88872  | -3.85581 | 2.21597  |

64

|                                                                                                      |          |          |          |
|------------------------------------------------------------------------------------------------------|----------|----------|----------|
| [Ir(C <sub>8</sub> H <sub>13</sub> )(py-ItBu')}{kO-(CH <sub>3</sub> ) <sub>2</sub> SO}] <sup>+</sup> | =====    |          |          |
| C                                                                                                    | -1.45735 | -2.40396 | 2.86036  |
| C                                                                                                    | -2.60677 | -1.75484 | 2.48698  |
| C                                                                                                    | 0.91457  | -2.46946 | 1.88099  |
| C                                                                                                    | -4.35482 | -0.76361 | 0.11303  |
| C                                                                                                    | -0.16356 | -1.91371 | -1.51910 |
| C                                                                                                    | 1.24867  | -2.44393 | -1.85648 |
| C                                                                                                    | 3.03822  | -1.36227 | 2.64659  |
| C                                                                                                    | 1.95587  | -1.37439 | 1.75147  |
| C                                                                                                    | -0.94509 | -1.02974 | 1.12915  |
| C                                                                                                    | -1.01983 | -1.71368 | -2.79237 |
| C                                                                                                    | 2.01273  | -1.66760 | -2.94196 |
| C                                                                                                    | -3.09019 | -0.01666 | 0.57849  |
| C                                                                                                    | 4.03683  | -0.38816 | 2.53271  |
| C                                                                                                    | -3.46626 | 1.21475  | 1.42903  |
| C                                                                                                    | -2.17786 | 0.37238  | -0.64391 |
| C                                                                                                    | -0.77472 | -0.33941 | -3.47535 |
| C                                                                                                    | 2.33050  | -0.20272 | -2.58467 |
| C                                                                                                    | 3.90216  | 0.56896  | 1.52054  |
| C                                                                                                    | 2.79254  | 0.50615  | 0.67315  |
| C                                                                                                    | -0.15298 | 0.68702  | -2.52352 |
| C                                                                                                    | 1.19390  | 0.69173  | -2.10106 |
| H                                                                                                    | -1.27420 | -3.13667 | 3.64203  |
| H                                                                                                    | 1.13328  | -3.08012 | 2.76915  |
| H                                                                                                    | 0.95484  | -3.13298 | 0.99698  |
| H                                                                                                    | -3.61216 | -1.81729 | 2.89367  |
| H                                                                                                    | -0.66336 | -2.67387 | -0.88855 |
| H                                                                                                    | -5.00915 | -1.04143 | 0.95783  |
| H                                                                                                    | 1.87287  | -2.50721 | -0.94476 |
| H                                                                                                    | 3.09075  | -2.12563 | 3.42841  |
| H                                                                                                    | -4.09105 | -1.67942 | -0.44138 |
| H                                                                                                    | -0.82919 | -2.54071 | -3.50455 |
| H                                                                                                    | 2.97113  | -2.18057 | -3.14139 |
| H                                                                                                    | -4.93924 | -0.11148 | -0.55631 |
| H                                                                                                    | -2.08544 | -1.79323 | -2.52092 |
| H                                                                                                    | 1.45391  | -1.71888 | -3.89153 |
| H                                                                                                    | -4.05775 | 0.92899  | 2.31592  |
| H                                                                                                    | 4.88900  | -0.37567 | 3.21817  |
| H                                                                                                    | -2.60740 | -0.07325 | -1.55396 |
| H                                                                                                    | -0.12593 | -0.44526 | -4.36301 |
| H                                                                                                    | -2.55518 | 1.73232  | 1.76966  |
| H                                                                                                    | -4.07806 | 1.91034  | 0.83044  |
| H                                                                                                    | 3.12900  | -0.19622 | -1.81831 |
| H                                                                                                    | -1.72942 | 0.06378  | -3.85304 |

|                                                  |          |          |          |
|--------------------------------------------------|----------|----------|----------|
| H                                                | 2.78166  | 0.29006  | -3.47059 |
| H                                                | -2.22693 | 1.46745  | -0.77073 |
| H                                                | 4.64462  | 1.35875  | 1.37702  |
| H                                                | 2.65360  | 1.24954  | -0.11081 |
| H                                                | -0.67568 | 1.65177  | -2.48387 |
| H                                                | 1.55287  | 1.67285  | -1.75029 |
| Ir                                               | -0.10558 | -0.10704 | -0.41927 |
| N                                                | -0.44606 | -1.94361 | 2.01124  |
| N                                                | -2.26897 | -0.92739 | 1.41853  |
| N                                                | 1.82754  | -0.44916 | 0.75161  |
| H                                                | 1.12823  | -3.48925 | -2.21149 |
| O                                                | 0.05872  | 1.97212  | 0.91640  |
| S                                                | -0.02526 | 3.51627  | 1.00387  |
| C                                                | 1.51178  | 4.21937  | 0.27042  |
| H                                                | 2.35057  | 3.87326  | 0.89141  |
| H                                                | 1.44840  | 5.31846  | 0.32035  |
| H                                                | 1.63497  | 3.88438  | -0.77152 |
| C                                                | -1.17073 | 4.14326  | -0.29348 |
| H                                                | -1.14093 | 5.24466  | -0.27041 |
| H                                                | -2.18110 | 3.79690  | -0.03415 |
| H                                                | -0.87712 | 3.76454  | -1.28474 |
| 64                                               |          |          |          |
| [Ir(C8H13)(py-ItBu')}{kS-(CH3)2SO}] <sup>+</sup> |          |          |          |
| C                                                | 1.36005  | -2.70369 | 2.42837  |
| C                                                | 2.54232  | -2.31469 | 1.85616  |
| C                                                | -0.99236 | -1.72307 | 2.38876  |
| C                                                | 4.00553  | 0.37618  | 1.29929  |
| C                                                | 0.10884  | 1.70477  | 1.57242  |
| C                                                | -1.31145 | 2.09886  | 2.03804  |
| C                                                | -3.22962 | -2.35651 | 1.45547  |
| C                                                | -2.06841 | -1.57346 | 1.33179  |
| C                                                | 0.90642  | -1.03800 | 0.95813  |
| C                                                | 0.96843  | 2.95876  | 1.27646  |
| C                                                | -2.02139 | 3.14488  | 1.16159  |
| C                                                | 3.14306  | -0.35104 | 0.24397  |
| C                                                | -4.29819 | -2.18600 | 0.56790  |
| C                                                | 4.03944  | -1.13680 | -0.73230 |
| C                                                | 2.20185  | 0.66113  | -0.50559 |
| C                                                | 0.78564  | 3.49398  | -0.17173 |
| C                                                | -2.30705 | 2.69810  | -0.28625 |
| C                                                | -4.15723 | -1.23154 | -0.44571 |
| C                                                | -2.96660 | -0.50351 | -0.52331 |
| C                                                | 0.17287  | 2.45888  | -1.11737 |
| C                                                | -1.18302 | 2.07746  | -1.11150 |
| H                                                | 1.14145  | -3.47340 | 3.16401  |
| H                                                | -1.22802 | -2.59109 | 3.02175  |
| H                                                | -1.00028 | -0.82601 | 3.03818  |
| H                                                | 3.55054  | -2.69384 | 1.99656  |
| H                                                | 0.59005  | 1.15517  | 2.40382  |
| H                                                | 4.64477  | -0.32888 | 1.85762  |
| H                                                | -1.95383 | 1.20466  | 2.14443  |
| H                                                | -3.28888 | -3.09437 | 2.26083  |
| H                                                | 3.37678  | 0.92154  | 2.02259  |
| H                                                | 0.73768  | 3.75333  | 2.01310  |

|    |          |          |          |
|----|----------|----------|----------|
| H  | -2.98901 | 3.40784  | 1.62590  |
| H  | 4.66805  | 1.09953  | 0.79661  |
| H  | 2.03095  | 2.71438  | 1.43397  |
| H  | -1.43553 | 4.07949  | 1.16600  |
| H  | 4.70233  | -1.83746 | -0.19487 |
| H  | -5.20862 | -2.78435 | 0.66449  |
| H  | 2.52933  | 1.67876  | -0.25540 |
| H  | 0.15225  | 4.39887  | -0.18722 |
| H  | 3.42387  | -1.70032 | -1.44967 |
| H  | 4.68497  | -0.43182 | -1.28192 |
| H  | -3.16161 | 1.99693  | -0.26700 |
| H  | 1.75950  | 3.81132  | -0.58105 |
| H  | -2.67523 | 3.57142  | -0.86330 |
| H  | 2.37231  | 0.54576  | -1.58971 |
| H  | -4.94916 | -1.04656 | -1.17645 |
| H  | -2.82089 | 0.22668  | -1.31862 |
| H  | 0.71719  | 2.30924  | -2.05835 |
| H  | -1.54420 | 1.65830  | -2.06516 |
| Ir | 0.08541  | 0.41584  | -0.13895 |
| N  | 0.36032  | -1.90308 | 1.86230  |
| N  | 2.23991  | -1.28682 | 0.96672  |
| N  | -1.92566 | -0.63869 | 0.34268  |
| H  | -1.22044 | 2.52737  | 3.05811  |
| S  | 0.22450  | -1.08188 | -2.21722 |
| C  | 0.60940  | -0.10955 | -3.73509 |
| H  | -0.18416 | 0.63330  | -3.91520 |
| H  | 0.69475  | -0.81070 | -4.57907 |
| H  | 1.57172  | 0.39547  | -3.57090 |
| C  | -1.29477 | -1.89053 | -2.87672 |
| H  | -2.03947 | -1.14453 | -3.19262 |
| H  | -1.69833 | -2.53350 | -2.08284 |
| H  | -0.97114 | -2.50722 | -3.72912 |
| O  | 1.25591  | -2.19034 | -2.09664 |

60

Complex 4 =====

|   |          |          |          |
|---|----------|----------|----------|
| C | 1.47049  | -2.71931 | 2.30032  |
| C | 2.63240  | -2.33234 | 1.68245  |
| C | -0.93635 | -1.83103 | 2.22753  |
| C | 4.39656  | -0.04195 | 0.56524  |
| C | 0.04155  | 1.54923  | 1.58557  |
| C | -1.40470 | 1.84433  | 2.06297  |
| C | -3.01778 | -2.69224 | 1.10475  |
| C | -1.95058 | -1.77801 | 1.09858  |
| C | 0.95499  | -1.07847 | 0.82368  |
| C | 0.83153  | 2.87196  | 1.40456  |
| C | -2.17051 | 2.89233  | 1.23714  |
| C | 3.10927  | -0.49927 | -0.14666 |
| C | -3.99652 | -2.64079 | 0.10492  |
| C | 3.45330  | -1.36619 | -1.37595 |
| C | 2.20727  | 0.73311  | -0.51802 |
| C | 0.65018  | 3.50086  | -0.00594 |
| C | -2.41676 | 2.49777  | -0.23037 |
| C | -3.86156 | -1.67123 | -0.89560 |
| C | -2.76951 | -0.79987 | -0.84709 |

|    |          |          |          |
|----|----------|----------|----------|
| C  | 0.09587  | 2.51313  | -1.03475 |
| C  | -1.23388 | 2.04784  | -1.07851 |
| H  | 1.28542  | -3.46869 | 3.06556  |
| H  | -1.14580 | -2.70327 | 2.86386  |
| H  | -1.03002 | -0.92494 | 2.85489  |
| H  | 3.64925  | -2.69293 | 1.80901  |
| H  | 0.53858  | 0.98076  | 2.39620  |
| H  | 5.06002  | -0.88957 | 0.81125  |
| H  | -2.00670 | 0.91630  | 2.10799  |
| H  | -3.07516 | -3.43923 | 1.90193  |
| H  | 4.16394  | 0.50467  | 1.49383  |
| H  | 0.53971  | 3.59660  | 2.19003  |
| H  | -3.15484 | 3.07208  | 1.70658  |
| H  | 4.95964  | 0.63306  | -0.09951 |
| H  | 1.90419  | 2.68098  | 1.57456  |
| H  | -1.64304 | 3.85973  | 1.29051  |
| H  | 4.04015  | -2.25497 | -1.08730 |
| H  | -4.83538 | -3.34267 | 0.10644  |
| H  | 2.54973  | 1.59888  | 0.06660  |
| H  | -0.01973 | 4.37888  | 0.03347  |
| H  | 2.53488  | -1.70403 | -1.88077 |
| H  | 4.05517  | -0.78031 | -2.08992 |
| H  | -3.18484 | 1.70126  | -0.25530 |
| H  | 1.61710  | 3.88257  | -0.37426 |
| H  | -2.88109 | 3.35512  | -0.76034 |
| H  | 2.36964  | 0.96809  | -1.58360 |
| H  | -4.58757 | -1.57941 | -1.70790 |
| H  | -2.62914 | -0.04458 | -1.62146 |
| H  | 0.65373  | 2.45548  | -1.97829 |
| H  | -1.54388 | 1.66219  | -2.06271 |
| Ir | 0.10540  | 0.40198  | -0.20580 |
| N  | 0.44742  | -1.93416 | 1.75602  |
| N  | 2.29138  | -1.31877 | 0.78930  |
| N  | -1.82444 | -0.82131 | 0.13021  |
| H  | -1.34639 | 2.21901  | 3.10612  |
| N  | 0.11001  | -0.54953 | -2.14600 |
| C  | 0.09407  | -0.95170 | -3.24894 |
| C  | 0.08877  | -1.45749 | -4.61759 |
| H  | -0.46242 | -2.41092 | -4.67068 |
| H  | -0.39212 | -0.73141 | -5.29377 |
| H  | 1.12206  | -1.62837 | -4.96255 |

54

|                        |          |          |          |
|------------------------|----------|----------|----------|
| [Ir(C8H13)(py-ItBu')]+ | =====    |          |          |
| C                      | -1.67055 | 3.03644  | 1.48583  |
| C                      | -2.78526 | 2.50866  | 0.87854  |
| C                      | 0.78217  | 2.24623  | 1.64280  |
| C                      | -4.47016 | 0.05892  | -0.09426 |
| C                      | 0.10330  | -1.34082 | 1.57666  |
| C                      | 1.58374  | -1.44545 | 1.98017  |
| C                      | 2.71728  | 3.11913  | 0.28374  |
| C                      | 1.76647  | 2.10834  | 0.49356  |
| C                      | -1.04283 | 1.14635  | 0.40738  |
| C                      | -0.62164 | -2.70204 | 1.55915  |
| C                      | 2.40837  | -2.52176 | 1.25526  |

|    |          |          |          |
|----|----------|----------|----------|
| C  | -3.07660 | 0.38065  | -0.65955 |
| C  | 3.63179  | 3.01952  | -0.77269 |
| C  | -3.18282 | 1.02038  | -2.06128 |
| C  | -2.15267 | -0.88742 | -0.68376 |
| C  | -0.40167 | -3.49932 | 0.24458  |
| C  | 2.56851  | -2.29575 | -0.26207 |
| C  | 3.54966  | 1.90033  | -1.60892 |
| C  | 2.58132  | 0.92751  | -1.34223 |
| C  | 0.03151  | -2.60743 | -0.92045 |
| C  | 1.31394  | -2.04224 | -1.09096 |
| H  | -1.54929 | 3.92427  | 2.10123  |
| H  | 0.93379  | 3.21242  | 2.14552  |
| H  | 0.94893  | 1.44846  | 2.38952  |
| H  | -3.81162 | 2.86476  | 0.86606  |
| H  | -0.41546 | -0.66368 | 2.27933  |
| H  | -5.13822 | 0.93779  | -0.11213 |
| H  | 2.08273  | -0.46362 | 1.88416  |
| H  | 2.73284  | 3.98450  | 0.95290  |
| H  | -4.40455 | -0.31352 | 0.94126  |
| H  | -0.29290 | -3.29439 | 2.43616  |
| H  | 3.41871  | -2.55360 | 1.70097  |
| H  | -4.94172 | -0.72249 | -0.71169 |
| H  | -1.69999 | -2.52830 | 1.70182  |
| H  | 1.97146  | -3.51458 | 1.45425  |
| H  | -3.75009 | 1.96600  | -2.03277 |
| H  | 4.37821  | 3.80078  | -0.94195 |
| H  | -2.53668 | -1.62140 | 0.04390  |
| H  | 0.34303  | -4.30268 | 0.38376  |
| H  | -2.17920 | 1.22982  | -2.47047 |
| H  | -3.70117 | 0.33335  | -2.74980 |
| H  | 3.26749  | -1.45203 | -0.41817 |
| H  | -1.33885 | -4.00841 | -0.03411 |
| H  | 3.08050  | -3.17589 | -0.70143 |
| H  | -2.24832 | -1.34888 | -1.68338 |
| H  | 4.22340  | 1.76750  | -2.45943 |
| H  | 2.49399  | 0.04685  | -1.98016 |
| H  | -0.56218 | -2.72220 | -1.83584 |
| H  | 1.54460  | -1.76871 | -2.13470 |
| Ir | -0.09421 | -0.43924 | -0.33423 |
| N  | -0.60897 | 2.17961  | 1.18345  |
| N  | -2.37599 | 1.34629  | 0.23409  |
| N  | 1.70097  | 0.99666  | -0.30535 |
| H  | 1.58966  | -1.68023 | 3.06633  |

56

|           |          |          |         |
|-----------|----------|----------|---------|
| Complex 5 | =====    |          |         |
| C         | 1.47091  | -3.09560 | 1.65000 |
| C         | 2.63668  | -2.61349 | 1.10983 |
| C         | -0.93333 | -2.19581 | 1.73159 |
| C         | 4.43714  | -0.20004 | 0.37383 |
| C         | -0.02283 | 1.20695  | 1.69564 |
| C         | -1.48504 | 1.41796  | 2.16547 |
| C         | -3.02508 | -2.86571 | 0.50363 |
| C         | -1.95714 | -1.96180 | 0.63369 |
| C         | 0.96967  | -1.22875 | 0.48178 |

|       |          |          |          |
|-------|----------|----------|----------|
| C     | 0.78172  | 2.52607  | 1.80028  |
| C     | -2.21187 | 2.61841  | 1.53562  |
| C     | 3.12324  | -0.48988 | -0.37754 |
| C     | -4.01141 | -2.65672 | -0.46791 |
| C     | 3.42489  | -1.10156 | -1.76164 |
| C     | 2.24713  | 0.80572  | -0.45647 |
| C     | 0.66953  | 3.41529  | 0.52834  |
| C     | -2.40738 | 2.52036  | 0.01303  |
| C     | -3.89045 | -1.53886 | -1.30116 |
| C     | -2.79997 | -0.68209 | -1.12231 |
| C     | 0.12670  | 2.67403  | -0.69306 |
| C     | -1.20316 | 2.24965  | -0.87480 |
| H     | 1.28134  | -3.96524 | 2.27384  |
| H     | -1.13945 | -3.15873 | 2.22089  |
| H     | -1.02030 | -1.40326 | 2.49733  |
| H     | 3.65164  | -2.99526 | 1.17330  |
| H     | 0.43936  | 0.48861  | 2.40100  |
| H     | 5.09415  | -1.08610 | 0.41201  |
| H     | -2.08979 | 0.50762  | 1.99399  |
| H     | -3.07474 | -3.73293 | 1.16845  |
| H     | 4.24398  | 0.14351  | 1.40322  |
| H     | 0.46132  | 3.09662  | 2.69434  |
| H     | -3.21177 | 2.71619  | 1.99564  |
| H     | 4.98966  | 0.59272  | -0.15592 |
| H     | 1.84505  | 2.29591  | 1.98047  |
| H     | -1.68115 | 3.55023  | 1.79490  |
| H     | 4.01043  | -2.03086 | -1.66164 |
| H     | -4.84593 | -3.35551 | -0.57553 |
| H     | 2.51610  | 1.46687  | 0.37800  |
| H     | 0.02206  | 4.29258  | 0.71050  |
| H     | 2.50438  | -1.33718 | -2.31733 |
| H     | 4.01853  | -0.39188 | -2.36042 |
| H     | -3.17681 | 1.75454  | -0.19898 |
| H     | 1.65866  | 3.82808  | 0.26952  |
| H     | -2.84875 | 3.46852  | -0.35832 |
| H     | 2.48371  | 1.33121  | -1.39504 |
| H     | -4.61953 | -1.32470 | -2.08684 |
| H     | -2.66963 | 0.18786  | -1.76826 |
| H     | 0.71274  | 2.79792  | -1.61275 |
| H     | -1.48539 | 2.08346  | -1.92497 |
| Ir    | 0.12320  | 0.40135  | -0.33150 |
| N     | 0.45185  | -2.22407 | 1.24891  |
| N     | 2.30284  | -1.45889 | 0.40588  |
| N     | -1.84744 | -0.86237 | -0.16983 |
| H     | -1.47320 | 1.57432  | 3.26393  |
| C     | 0.16624  | -0.11732 | -2.20798 |
| O     | 0.11615  | -0.32531 | -3.35543 |
| 6     |          |          |          |
| CH3CN | =====    | =====    | =====    |
| N     | -1.45060 | 0.00000  | 0.00002  |
| C     | -0.27711 | -0.00002 | -0.00003 |
| C     | 1.18502  | 0.00000  | 0.00001  |
| H     | 1.56890  | -0.25949 | 1.00012  |
| H     | 1.56895  | -0.73635 | -0.72477 |



|           |          |          |          |
|-----------|----------|----------|----------|
| H         | 1.56888  | 0.99588  | -0.27530 |
| 2         |          |          |          |
| C0        | =====    | =====    | =====    |
| C         | 0.00000  | 0.00000  | -0.65714 |
| O         | 0.00000  | 0.00000  | 0.49286  |
| 5         |          |          |          |
| CH2Cl2    | =====    | =====    | =====    |
| C         | 0.00000  | 0.00000  | 0.76745  |
| H         | -0.90778 | 0.00000  | 1.38252  |
| H         | 0.90778  | 0.00000  | 1.38252  |
| Cl        | 0.00000  | 1.50375  | -0.21676 |
| Cl        | 0.00000  | -1.50375 | -0.21676 |
| 10        |          |          |          |
| (CH3)2SO  | =====    | =====    | =====    |
| S         | 0.25860  | 0.43671  | 0.00000  |
| O         | -1.09768 | 1.12982  | 0.00000  |
| C         | 0.25860  | -0.81506 | 1.36819  |
| H         | -0.62952 | -1.46033 | 1.27718  |
| H         | 1.18586  | -1.40920 | 1.32906  |
| H         | 0.21406  | -0.25303 | 2.31276  |
| C         | 0.25860  | -0.81506 | -1.36819 |
| H         | -0.62952 | -1.46033 | -1.27718 |
| H         | 0.21406  | -0.25303 | -2.31276 |
| H         | 1.18586  | -1.40920 | -1.32906 |
| 54        |          |          |          |
| Complex 8 | =====    | =====    | =====    |
| Rh        | 0.59679  | -0.38725 | -0.05085 |
| N         | -1.23968 | 1.35479  | 1.40742  |
| C         | -1.26677 | 0.30139  | 0.52053  |
| N         | 0.94617  | 1.68796  | -0.47681 |
| C         | 2.38553  | -1.11161 | -1.14091 |
| N         | -2.60333 | 0.13891  | 0.23189  |
| C         | 0.33417  | -2.53965 | 0.20228  |
| C         | 0.95388  | 3.95006  | 0.37432  |
| C         | 1.34929  | -3.37982 | -0.57469 |
| C         | -4.55786 | -0.32012 | -1.24609 |
| C         | 0.02268  | 2.01795  | 1.76806  |
| C         | -3.21522 | -0.87019 | -0.71656 |
| C         | 0.57644  | -1.92633 | 1.45934  |
| C         | -2.26846 | -1.06789 | -1.91626 |
| C         | -3.37193 | 1.06088  | 0.95157  |
| C         | 2.14665  | -2.53849 | -1.60320 |
| C         | 1.50088  | 4.42373  | -0.82817 |
| C         | 2.79877  | -0.71553 | 0.14272  |
| C         | -3.47247 | -2.17780 | 0.06260  |
| C         | -2.51567 | 1.83591  | 1.67981  |
| C         | 0.67654  | 2.58464  | 0.51824  |
| C         | 3.12348  | -1.67360 | 1.28487  |
| C         | 1.90082  | -1.92753 | 2.20509  |
| C         | 1.44808  | 2.15647  | -1.64806 |
| C         | 1.73651  | 3.50914  | -1.86254 |
| H         | 1.85536  | -1.14238 | 2.98136  |
| H         | 2.02120  | -2.88431 | 2.75358  |
| H         | 3.50156  | -2.62438 | 0.87449  |

|   |          |          |          |
|---|----------|----------|----------|
| H | 3.94742  | -1.25249 | 1.88507  |
| H | 3.21016  | 0.29769  | 0.24103  |
| H | 2.54645  | -0.39295 | -1.95774 |
| H | -0.29716 | -1.75628 | 2.10422  |
| H | -0.71193 | -2.76794 | -0.02863 |
| H | 0.81512  | -4.18545 | -1.10593 |
| H | 2.03133  | -3.88679 | 0.12904  |
| H | 1.58449  | -2.49523 | -2.55252 |
| H | 3.11044  | -3.03072 | -1.84412 |
| H | 0.68800  | 1.27454  | 2.24135  |
| H | -0.19761 | 2.81732  | 2.49163  |
| H | 0.73720  | 4.63476  | 1.19954  |
| H | 1.72489  | 5.48662  | -0.95625 |
| H | 2.14086  | 3.82738  | -2.82688 |
| H | 1.61775  | 1.41210  | -2.42964 |
| H | -2.70454 | 2.66017  | 2.36280  |
| H | -4.45389 | 1.09665  | 0.88920  |
| H | -3.92034 | -2.93161 | -0.60520 |
| H | -4.17278 | -2.00285 | 0.89639  |
| H | -2.54536 | -2.59643 | 0.48334  |
| H | -4.44137 | 0.68271  | -1.68907 |
| H | -5.34192 | -0.28576 | -0.47203 |
| H | -4.92078 | -0.99717 | -2.03549 |
| H | -2.66499 | -1.86610 | -2.56469 |
| H | -2.20170 | -0.14209 | -2.51209 |
| H | -1.24773 | -1.34435 | -1.59996 |

60

[Rh(C8H13)(py-ItBu')(NCMe)]+ =====

|   |          |          |          |
|---|----------|----------|----------|
| C | -1.42800 | -2.67011 | -2.28961 |
| C | -2.59523 | -2.31929 | -1.66040 |
| C | 0.96002  | -1.74589 | -2.22606 |
| C | -4.41505 | -0.08792 | -0.48998 |
| C | -0.11363 | 1.61063  | -1.55290 |
| C | 1.33006  | 1.92267  | -2.01521 |
| C | 3.04454  | -2.60837 | -1.10371 |
| C | 1.97332  | -1.69842 | -1.09538 |
| C | -0.94647 | -1.01310 | -0.81740 |
| C | -0.93139 | 2.90862  | -1.35793 |
| C | 2.08370  | 2.98831  | -1.20104 |
| C | -3.09985 | -0.51700 | 0.18859  |
| C | 4.01492  | -2.55705 | -0.09530 |
| C | -3.39339 | -1.41310 | 1.41031  |
| C | -2.22581 | 0.73050  | 0.55859  |
| C | -0.73888 | 3.55431  | 0.04411  |
| C | 2.34750  | 2.60076  | 0.26484  |
| C | 3.86833  | -1.59484 | 0.91075  |
| C | 2.77131  | -0.72818 | 0.85740  |
| C | -0.15199 | 2.59039  | 1.07436  |
| C | 1.17375  | 2.15651  | 1.12270  |
| H | -1.22769 | -3.41305 | -3.05746 |
| H | 1.16918  | -2.61394 | -2.86830 |
| H | 1.05205  | -0.83698 | -2.84919 |
| H | -3.60209 | -2.71014 | -1.77680 |
| H | -0.59850 | 1.02337  | -2.35534 |

|                                    |          |          |          |
|------------------------------------|----------|----------|----------|
| H                                  | -5.05530 | -0.95269 | -0.73808 |
| H                                  | 1.94530  | 1.00428  | -2.05485 |
| H                                  | 3.11207  | -3.35028 | -1.90500 |
| H                                  | -4.21933 | 0.48195  | -1.41306 |
| H                                  | -0.66948 | 3.63454  | -2.15390 |
| H                                  | 3.06126  | 3.17885  | -1.67999 |
| H                                  | -4.98628 | 0.55631  | 0.19790  |
| H                                  | -2.00136 | 2.69138  | -1.50953 |
| H                                  | 1.54223  | 3.94775  | -1.25482 |
| H                                  | -3.96545 | -2.31053 | 1.11864  |
| H                                  | 4.85746  | -3.25469 | -0.09456 |
| H                                  | -2.58517 | 1.59847  | -0.01099 |
| H                                  | -0.08751 | 4.44468  | -0.01731 |
| H                                  | -2.45513 | -1.73733 | 1.88648  |
| H                                  | -3.99240 | -0.85528 | 2.14883  |
| H                                  | 3.11619  | 1.80527  | 0.28566  |
| H                                  | -1.70740 | 3.92229  | 0.42177  |
| H                                  | 2.81646  | 3.46072  | 0.78703  |
| H                                  | -2.35504 | 0.94703  | 1.63179  |
| H                                  | 4.58871  | -1.50585 | 1.72847  |
| H                                  | 2.62291  | 0.02348  | 1.63496  |
| H                                  | -0.72874 | 2.47586  | 2.00050  |
| H                                  | 1.48251  | 1.72577  | 2.08732  |
| Rh                                 | -0.13362 | 0.45909  | 0.21914  |
| N                                  | -0.42400 | -1.85451 | -1.75569 |
| N                                  | -2.27426 | -1.29493 | -0.77267 |
| N                                  | 1.83501  | -0.74951 | -0.12506 |
| N                                  | -0.09088 | -0.51129 | 2.19612  |
| C                                  | -0.06677 | -0.89573 | 3.30411  |
| C                                  | -0.05269 | -1.37392 | 4.68303  |
| H                                  | 0.38446  | -2.38488 | 4.73273  |
| H                                  | 0.54335  | -0.69656 | 5.31685  |
| H                                  | -1.08106 | -1.41326 | 5.07909  |
| H                                  | 1.26565  | 2.28763  | -3.06233 |
| 54                                 |          |          |          |
| [Rh(C8H13)(py-ItBu')] <sup>+</sup> | =====    |          |          |
| C                                  | 1.03099  | -3.31268 | 1.25037  |
| C                                  | 2.21650  | -2.99097 | 0.63704  |
| C                                  | -1.19994 | -2.07409 | 1.54456  |
| C                                  | 4.04369  | -0.38511 | 0.37173  |
| C                                  | 0.45157  | 1.36045  | 1.44028  |
| C                                  | -0.90594 | 1.78111  | 2.02345  |
| C                                  | -3.33695 | -2.51297 | 0.27591  |
| C                                  | -2.20365 | -1.70646 | 0.46609  |
| C                                  | 0.76650  | -1.29192 | 0.25595  |
| C                                  | 1.45979  | 2.50702  | 1.25856  |
| C                                  | -1.57371 | 3.01648  | 1.39820  |
| C                                  | 2.97877  | -0.83391 | -0.65037 |
| C                                  | -4.27151 | -2.18368 | -0.71503 |
| C                                  | 3.64036  | -1.56764 | -1.83488 |
| C                                  | 2.10451  | 0.36363  | -1.14357 |
| C                                  | 1.20408  | 3.37297  | -0.00465 |
| C                                  | -1.99185 | 2.84499  | -0.07598 |
| C                                  | -4.02748 | -1.05081 | -1.49960 |

|    |          |          |          |
|----|----------|----------|----------|
| C  | -2.87819 | -0.29253 | -1.24853 |
| C  | 0.42562  | 2.62167  | -1.08207 |
| C  | -0.94634 | 2.36193  | -1.07040 |
| H  | 0.74265  | -4.18964 | 1.82458  |
| H  | -1.50122 | -3.01339 | 2.03052  |
| H  | -1.16962 | -1.28830 | 2.32164  |
| H  | 3.14934  | -3.54499 | 0.57912  |
| H  | 0.89556  | 0.58368  | 2.08741  |
| H  | 4.62052  | -1.24347 | 0.75562  |
| H  | -1.60974 | 0.92737  | 2.00597  |
| H  | -3.48023 | -3.39631 | 0.90538  |
| H  | 3.58047  | 0.13003  | 1.22899  |
| H  | 1.45922  | 3.13909  | 2.17057  |
| H  | -2.48177 | 3.25853  | 1.97885  |
| H  | 4.75302  | 0.30692  | -0.11057 |
| H  | 2.47041  | 2.07457  | 1.19113  |
| H  | -0.91203 | 3.89077  | 1.51475  |
| H  | 4.26365  | -2.41271 | -1.49444 |
| H  | -5.15996 | -2.80193 | -0.87261 |
| H  | 2.68964  | 1.29231  | -1.05936 |
| H  | 0.66435  | 4.30174  | 0.25034  |
| H  | 2.88193  | -1.95058 | -2.53751 |
| H  | 4.29726  | -0.87116 | -2.38034 |
| H  | -2.85826 | 2.15887  | -0.11891 |
| H  | 2.16929  | 3.69883  | -0.42663 |
| H  | -2.37677 | 3.81467  | -0.45344 |
| H  | 1.85832  | 0.22023  | -2.21895 |
| H  | -4.71201 | -0.74543 | -2.29535 |
| H  | -2.66748 | 0.59618  | -1.84658 |
| H  | 0.92093  | 2.54192  | -2.05802 |
| H  | -1.36638 | 2.10203  | -2.05522 |
| Rh | 0.13786  | 0.45286  | -0.42116 |
| N  | 0.15360  | -2.25327 | 1.00711  |
| N  | 2.02910  | -1.74923 | 0.03744  |
| N  | -1.97120 | -0.58588 | -0.27979 |
| H  | -0.72631 | 1.99514  | 3.09948  |
